# Supplementary material for: Potential Antioxidative Activity of Homocysteine in Erythrocytes under Oxidative Stress
Source: MDPI journal article supplement (doi:10.3390/antiox12010202), 2023-01-15
Supplement: s1 [file s1]

Supplementary File

**Table S1:** The release velocity of homocysteine in each whole blood sample from six volunteers during storage at room temperature.

| Volunteers | Equation                       | R square | Release velocity ( $\mu\text{M/h}$ ) |
|------------|--------------------------------|----------|--------------------------------------|
| a          | $Y = 0.7097 \times X + 0.5153$ | 0.9818   | 1.225                                |
| b          | $Y = 1.143 \times X - 0.4263$  | 0.9654   | 0.717                                |
| c          | $Y = 0.8130 \times X + 0.3158$ | 0.9518   | 1.129                                |
| d          | $Y = 1.077 \times X + 0.1115$  | 0.9891   | 1.189                                |
| e          | $Y = 0.9964 \times X + 1.010$  | 0.8889   | 2.006                                |
| f          | $Y = 1.564 \times X - 0.1739$  | 0.9687   | 1.390                                |

**Table S2:** The concentrations of NaCl solution leading to 50% hemolysis after treatment with r-Hcy (mean  $\pm$  SD, n=4) .

| Groups                | % NaCl            |
|-----------------------|-------------------|
| Control               | $0.33 \pm 0.01$   |
| Rosup                 | $0.43 \pm 0.01$   |
| Rosup + 0.05 mM r-Hcy | $0.43 \pm 0.02$   |
| Rosup + 0.1 mM r-Hcy  | $0.41 \pm 0.03$   |
| Rosup + 0.2 mM r-Hcy  | $0.41 \pm 0.02$   |
| Rosup + 0.4 mM r-Hcy  | $0.38 \pm 0.03$   |
| Rosup + 0.8 mM r-Hcy  | $0.34 \pm 0.02^*$ |

\*  $p < 0.05$  vs Rosup group.

**Table S3:** The concentrations of NaCl solution leading to 50% hemolysis after treatment with methionine (mean  $\pm$  SD, n=4) .

| Groups                    | % NaCl            |
|---------------------------|-------------------|
| Control                   | $0.34 \pm 0.01$   |
| Rosup                     | $0.45 \pm 0.03$   |
| Rosup + 0.1 mM Methionine | $0.45 \pm 0.02$   |
| Rosup + 0.2 mM Methionine | $0.44 \pm 0.02$   |
| Rosup + 0.5 mM Methionine | $0.41 \pm 0.03$   |
| Rosup + 1 mM Methionine   | $0.39 \pm 0.03^*$ |
| Rosup + 2 mM Methionine   | $0.36 \pm 0.02^*$ |

\*  $p < 0.05$  vs Rosup group.

**Table S4:** The effects of r-Hcy on ferryl Hb decay (Absorbance change at 405-425nm, mean  $\pm$  SD, n=3)

| Time (s) | Groups (r-Hcy, mM) |                     |                     |                     |                     |                     |                     |
|----------|--------------------|---------------------|---------------------|---------------------|---------------------|---------------------|---------------------|
|          | Control            | 0.025               | 0.050               | 0.1                 | 0.2                 | 0.4                 | 0.8                 |
| 70       | $0.051 \pm 0.003$  | $0.085 \pm 0.001^*$ | $0.095 \pm 0.003^*$ | $0.096 \pm 0.006^*$ | $0.108 \pm 0.002^*$ | $0.130 \pm 0.004^*$ | $0.152 \pm 0.002^*$ |
| 140      | $0.090 \pm 0.005$  | $0.125 \pm 0.001^*$ | $0.136 \pm 0.003^*$ | $0.139 \pm 0.006^*$ | $0.157 \pm 0.003^*$ | $0.187 \pm 0.005^*$ | $0.219 \pm 0.002^*$ |
| 210      | $0.122 \pm 0.005$  | $0.154 \pm 0.001^*$ | $0.165 \pm 0.003^*$ | $0.170 \pm 0.007^*$ | $0.191 \pm 0.003^*$ | $0.224 \pm 0.004^*$ | $0.261 \pm 0.001^*$ |
| 280      | $0.148 \pm 0.006$  | $0.176 \pm 0.001^*$ | $0.188 \pm 0.004^*$ | $0.194 \pm 0.007^*$ | $0.217 \pm 0.002^*$ | $0.252 \pm 0.005^*$ | $0.291 \pm 0.003^*$ |
| 350      | $0.171 \pm 0.006$  | $0.195 \pm 0.001^*$ | $0.207 \pm 0.003^*$ | $0.213 \pm 0.006^*$ | $0.236 \pm 0.003^*$ | $0.273 \pm 0.006^*$ | $0.312 \pm 0.003^*$ |
| 420      | $0.191 \pm 0.006$  | $0.212 \pm 0.001^*$ | $0.224 \pm 0.003^*$ | $0.230 \pm 0.006^*$ | $0.254 \pm 0.002^*$ | $0.290 \pm 0.005^*$ | $0.328 \pm 0.003^*$ |

|     |               |                |                |                |                |                |                |
|-----|---------------|----------------|----------------|----------------|----------------|----------------|----------------|
| 490 | 0.209 ± 0.006 | 0.227 ± 0.001* | 0.240 ± 0.003* | 0.245 ± 0.006* | 0.268 ± 0.003* | 0.305 ± 0.005* | 0.340 ± 0.003* |
| 560 | 0.225 ± 0.006 | 0.241 ± 0.000* | 0.254 ± 0.004* | 0.259 ± 0.007* | 0.280 ± 0.001* | 0.316 ± 0.006* | 0.350 ± 0.003* |
| 630 | 0.240 ± 0.007 | 0.253 ± 0.001* | 0.266 ± 0.005* | 0.271 ± 0.006* | 0.292 ± 0.001* | 0.326 ± 0.006* | 0.358 ± 0.004* |

\*  $p < 0.05$  vs Control group.

**Table S5:** The effects of methionine on ferryl Hb decay (Absorbance change at 405-425nm, mean ± SD, n=3)

| Time (s) | Groups (Methionine, mM) |               |               |                |               |               |
|----------|-------------------------|---------------|---------------|----------------|---------------|---------------|
|          | Control                 | 0.1           | 0.2           | 0.5            | 1             | 2             |
| 70       | 0.046 ± 0.005           | 0.047 ± 0.002 | 0.050 ± 0.002 | 0.055 ± 0.003  | 0.050 ± 0.003 | 0.050 ± 0.003 |
| 140      | 0.083 ± 0.008           | 0.083 ± 0.003 | 0.088 ± 0.007 | 0.096 ± 0.005  | 0.089 ± 0.003 | 0.090 ± 0.008 |
| 210      | 0.112 ± 0.009           | 0.113 ± 0.003 | 0.120 ± 0.007 | 0.128 ± 0.006  | 0.120 ± 0.003 | 0.122 ± 0.010 |
| 280      | 0.136 ± 0.010           | 0.138 ± 0.002 | 0.146 ± 0.008 | 0.155 ± 0.008* | 0.146 ± 0.004 | 0.148 ± 0.011 |
| 350      | 0.157 ± 0.010           | 0.159 ± 0.003 | 0.170 ± 0.007 | 0.179 ± 0.008* | 0.168 ± 0.005 | 0.170 ± 0.012 |
| 420      | 0.176 ± 0.011           | 0.178 ± 0.002 | 0.190 ± 0.008 | 0.200 ± 0.009* | 0.189 ± 0.004 | 0.190 ± 0.012 |
| 490      | 0.193 ± 0.012           | 0.196 ± 0.002 | 0.208 ± 0.007 | 0.219 ± 0.010* | 0.207 ± 0.003 | 0.207 ± 0.012 |
| 560      | 0.208 ± 0.011           | 0.211 ± 0.001 | 0.224 ± 0.007 | 0.235 ± 0.011* | 0.222 ± 0.002 | 0.222 ± 0.013 |
| 630      | 0.222 ± 0.012           | 0.225 ± 0.001 | 0.238 ± 0.007 | 0.248 ± 0.010* | 0.237 ± 0.001 | 0.235 ± 0.013 |

\*  $p < 0.05$  vs Control group.

**Table S6:** The effects of r-Hcy and methionine on MetHb formation in Rosup-treated erythrocytes (represented by the absorbance at 630 nm, mean ± SD, n=3)

| Groups                    | Time (h)       |                |                |                |
|---------------------------|----------------|----------------|----------------|----------------|
|                           | 1.5            | 3              | 6              | 9              |
| Control                   | 0.059 ± 0.001  | 0.060 ± 0.000  | 0.061 ± 0.001  | 0.060 ± 0.002  |
| Rosup                     | 0.082 ± 0.001* | 0.093 ± 0.004* | 0.139 ± 0.014* | 0.172 ± 0.021* |
| Rosup + 0.05 mM r-Hcy     | 0.088 ± 0.003  | 0.098 ± 0.003  | 0.139 ± 0.005  | 0.160 ± 0.009  |
| Rosup + 0.1 mM r-Hcy      | 0.092 ± 0.004  | 0.103 ± 0.005  | 0.143 ± 0.011  | 0.168 ± 0.016  |
| Rosup + 0.2 mM r-Hcy      | 0.095 ± 0.002  | 0.106 ± 0.001  | 0.142 ± 0.001  | 0.168 ± 0.002  |
| Rosup + 0.4 mM r-Hcy      | 0.084 ± 0.005  | 0.097 ± 0.008  | 0.137 ± 0.004  | 0.167 ± 0.002  |
| Rosup + 0.8 mM r-Hcy      | 0.068 ± 0.001  | 0.069 ± 0.000# | 0.087 ± 0.003# | 0.116 ± 0.002# |
| Rosup + 0.5 mM Methionine | 0.080 ± 0.001  | 0.085 ± 0.000  | 0.115 ± 0.003# | 0.144 ± 0.006# |
| Rosup + 1 mM Methionine   | 0.079 ± 0.001  | 0.083 ± 0.003  | 0.108 ± 0.003# | 0.140 ± 0.005# |
| Rosup + 2 mM Methionine   | 0.077 ± 0.001  | 0.080 ± 0.001  | 0.102 ± 0.001# | 0.133 ± 0.005# |

\*  $p < 0.05$  vs Control group, #  $p < 0.05$  vs Rosup group.

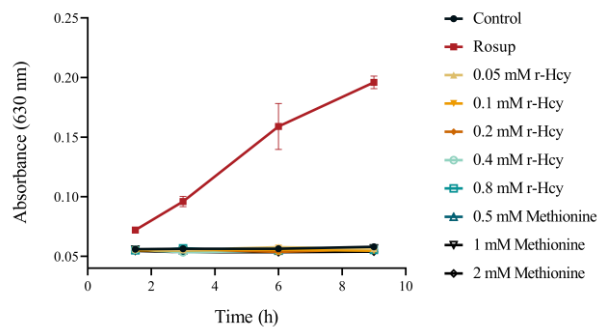

**Figure S1:** The effects of r-Hcy and methionine on MetHb formation in control erythrocytes. After treatment with different concentrations of methionine (0.5, 1, 2mM) or r-Hcy (0.05, 0.1, 0.2, 0.4, 0.8 mM) for 1.5 h, 3 h, 6 h and 9 h, the absorbance at 630 nm did not change significantly compared with Control ( $p > 0.05$ ).
